# Supplementary material
Source: PubMed Central journal article supplement (PMC4421004)
Supplement: EC.00011-15_zek999094422so1.pdf [file EC.00011-15_zek999094422so1.pdf]

Supplemental Table1: Strains used in this study

| Name   | Genotype                                                                                                                                                                                                                                                                                                                                                                                                                                                | Source     |
|--------|---------------------------------------------------------------------------------------------------------------------------------------------------------------------------------------------------------------------------------------------------------------------------------------------------------------------------------------------------------------------------------------------------------------------------------------------------------|------------|
| SC5314 | Wild-type prototrophic <i>Candida albicans</i>                                                                                                                                                                                                                                                                                                                                                                                                          | (1)        |
| BWP17  | MTLa/ $\alpha$ <i>ura3</i> $\Delta$ :: $\lambda$ <i>imm</i> <sup>434</sup> / <i>ura3</i> $\Delta$ :: $\lambda$ <i>imm</i> <sup>434</sup><br><i>his1</i> $\Delta$ :: <i>hisG</i> / <i>his1</i> $\Delta$ :: <i>hisG</i> <i>arg4</i> $\Delta$ :: <i>hisG</i> / <i>arg4</i> $\Delta$ :: <i>hisG</i>                                                                                                                                                         | (2)        |
| yLM255 | Encodes CycC(Ssn8)-HF<br>MTLa/ $\alpha$ <i>ura3</i> $\Delta$ :: $\lambda$ <i>imm</i> <sup>434</sup> / <i>ura3</i> $\Delta$ :: $\lambda$ <i>imm</i> <sup>434</sup><br><i>his1</i> $\Delta$ :: <i>hisG</i> / <i>his1</i> $\Delta$ :: <i>hisG</i> <i>arg4</i> $\Delta$ :: <i>hisG</i> / <i>arg4</i> $\Delta$ :: <i>hisG</i><br><i>SSN8</i> :: <i>SSN8-6XHis-3XFLAG-HIS1</i> / <i>SSN8</i> :: <i>SSN8-6XHis-3XFLAG-ARG4</i>                                 | This study |
| yLM256 | MTLa/ $\alpha$ <i>ura3</i> $\Delta$ :: $\lambda$ <i>imm</i> <sup>434</sup> / <i>ura3</i> $\Delta$ :: $\lambda$ <i>imm</i> <sup>434</sup><br><i>his1</i> $\Delta$ :: <i>hisG</i> / <i>his1</i> $\Delta$ :: <i>hisG</i> <i>arg4</i> $\Delta$ :: <i>hisG</i> / <i>arg4</i> $\Delta$ :: <i>hisG</i><br><i>SSN3</i> :: <i>SSN3-6XHis-3XFLAG-HIS1</i> / <i>SSN3</i> :: <i>SSN3-6XHis-3XFLAG-SAT1</i>                                                          | This study |
| cTTR03 | MTLa/ $\alpha$ <i>ura3</i> $\Delta$ :: $\lambda$ <i>imm</i> <sup>434</sup> / <i>ura3</i> $\Delta$ :: $\lambda$ <i>imm</i> <sup>434</sup><br><i>his1</i> $\Delta$ :: <i>hisG</i> / <i>his1</i> $\Delta$ :: <i>hisG</i> <i>arg4</i> $\Delta$ :: <i>hisG</i> / <i>arg4</i> $\Delta$ :: <i>hisG</i><br><i>MED8</i> :: <i>MED8-6XHis-3XFLAG-SAT1</i> /<br><i>MED8</i> :: <i>MED8-6XHis-3XFLAG-HIS1</i><br><i>MED3</i> / <i>MED3</i> :: <i>MED3-3XHA-ARG4</i> | (3)        |
| AZC52  | <i>arg4</i> / <i>arg4</i> <i>leu2</i> / <i>leu2</i> <i>his1</i> / <i>his1URA3</i> / <i>ura3</i> :: <i>imm434</i><br><i>IRO1</i> / <i>iro1</i> :: <i>imm434</i> <i>med12</i> $\Delta$ :: <i>HIS1</i> / <i>med12</i> $\Delta$ :: <i>LEU2</i>                                                                                                                                                                                                              | (3)        |
| yLM257 | <i>arg4</i> / <i>arg4</i> <i>leu2</i> / <i>leu2</i> <i>his1</i> / <i>his1URA3</i> / <i>ura3</i> :: <i>imm434</i><br><i>IRO1</i> / <i>iro1</i> :: <i>imm434</i> <i>med12</i> $\Delta$ :: <i>HIS1</i> / <i>med12</i> $\Delta$ :: <i>LEU2</i><br><i>MED8</i> :: <i>MED8-6XHis-3XFLAG-SAT1</i> /<br><i>MED8</i> :: <i>MED8-6XHis-3XFLAG-ARG4</i>                                                                                                            | This study |
| cTTR01 | <i>arg4</i> / <i>arg4</i> <i>leu2</i> / <i>leu2</i> <i>his1</i> / <i>his1URA3</i> / <i>ura3</i> :: <i>imm434</i><br><i>IRO1</i> / <i>iro1</i> :: <i>imm434</i> <i>med15</i> $\Delta$ :: <i>HIS1</i> / <i>med15</i> $\Delta$ :: <i>LEU2</i>                                                                                                                                                                                                              | (3)        |
| yLM258 | <i>arg4</i> / <i>arg4</i> <i>leu2</i> / <i>leu2</i> <i>his1</i> / <i>his1URA3</i> / <i>ura3</i> :: <i>imm434</i><br><i>IRO1</i> / <i>iro1</i> :: <i>imm434</i> <i>med15</i> $\Delta$ :: <i>HIS1</i> / <i>med15</i> $\Delta$ :: <i>LEU2</i><br><i>MED8</i> / <i>MED8</i> :: <i>MED8-6XHis-3XFLAG-SAT1</i><br><i>MED3</i> / <i>MED3-3HA-HIS1</i>                                                                                                          | This study |
| AZC63  | <i>arg4</i> / <i>arg4</i> <i>leu2</i> / <i>leu2</i> <i>his1</i> / <i>his1URA3</i> / <i>ura3</i> :: <i>imm434</i><br><i>IRO1</i> / <i>iro1</i> :: <i>imm434</i> <i>med9</i> $\Delta$ :: <i>HIS1</i> / <i>med9</i> $\Delta$ :: <i>LEU2</i>                                                                                                                                                                                                                | (3)        |
| yLM259 | <i>arg4</i> / <i>arg4</i> <i>leu2</i> / <i>leu2</i> <i>his1</i> / <i>his1URA3</i> / <i>ura3</i> :: <i>imm434</i><br><i>IRO1</i> / <i>iro1</i> :: <i>imm434</i> <i>med9</i> $\Delta$ :: <i>HIS1</i> / <i>med9</i> $\Delta$ :: <i>LEU2</i><br><i>MED8</i> :: <i>MED8-6XHis-3XFLAG-SAT1</i> /<br><i>MED8</i> :: <i>MED8-6XHis-3XFLAG-ARG4</i>                                                                                                              | This study |
| SN913  | <i>ssn3</i> $\Delta$ :: <i>C.m.LEU2/ssn3</i> $\Delta$ :: <i>C.d.HIS1</i> <i>his1</i> $\Delta$ / <i>his1</i> $\Delta$                                                                                                                                                                                                                                                                                                                                    | (4)        |

---

|        |                                                                                                                                                       |            |
|--------|-------------------------------------------------------------------------------------------------------------------------------------------------------|------------|
|        | <i>arg4Δ/arg4Δ leu2Δ/leu2Δ ura3Δ/URA iro1Δ/IRO1</i>                                                                                                   |            |
| yLM260 | <i>ssn3Δ::C.m.LEU2/ssn3Δ::C.d.HIS1 his1Δ/his1Δ</i><br><i>arg4Δ/arg4Δ leu2Δ/leu2Δ ura3Δ/URA iro1Δ/IRO1</i><br><i>MED8/MED8::MED8-6XHis-3XFLAG-SAT1</i> | This study |

---

### Supplemental references

1. **Gillum AM, Tsay EY, Kirsch DR.** 1984. Isolation of the *Candida albicans* gene for orotidine-5'-phosphate decarboxylase by complementation of *S. cerevisiae ura3* and *E. coli pyrF* mutations. *Mol Gen Genet* **198**:179-182.
2. **Wilson RB, Davis D, Mitchell AP.** 1999. Rapid hypothesis testing with *Candida albicans* through gene disruption with short homology regions. *J Bacteriol* **181**:1868-1874.
3. **Zhang A, Liu Z, Myers LC.** 2013. Differential regulation of white-opaque switching by individual subunits of *Candida albicans* mediator. *Eukaryot Cell* **12**:1293-1304.
4. **Chen C, Noble SM.** 2012. Post-transcriptional regulation of the Sef1 transcription factor controls the virulence of *Candida albicans* in its mammalian host. *PLoS Pathog* **8**:e1002956.
